# Supplementary material
Source: publisher figshare collection journal article supplement (https://plos.figshare.com/articles/dataset/_/142559)
Supplement: Supplementary file [file 1]

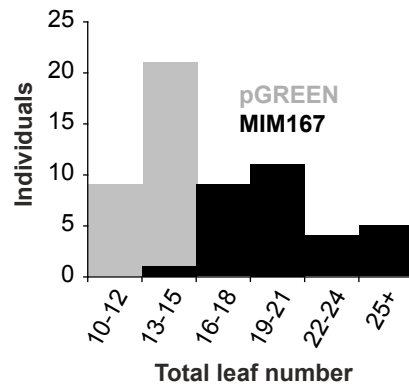

**Supplementary Figure 2. Flowering time of *MIM167* plants and Col-0 controls.**

Distribution of flowering times of primary transformants of plants transformed with *MIM167* or empty pGREEN binary vector, grown at 23°C in long days.
